# Supplementary material
Source: publisher figshare collection journal article supplement (https://tandf.figshare.com/articles/dataset/_/9872795)
Supplement: Supplementary file 1 [file 1]

Archive with 13 entries (13 files):
- icnv_a_1663208_sm2559.pdf
- icnv_a_1663208_sm2554.pdf
- icnv_a_1663208_sm2549.pdf
- icnv_a_1663208_sm2548.pdf
- icnv_a_1663208_sm2547.pdf
- icnv_a_1663208_sm2546.pdf
- icnv_a_1663208_sm2545.pdf
- icnv_a_1663208_sm2544.pdf
- icnv_a_1663208_sm2543.pdf
- icnv_a_1663208_sm2540.pdf
- icnv_a_1663208_sm2538.pdf
- icnv_a_1663208_sm2537.pdf
- icnv_a_1663208_sm2534.pdf
