# Supplementary material
Source: publisher figshare collection journal article supplement (https://tandf.figshare.com/articles/dataset/_/9872795)
Supplement: Supplementary file 1 [file 1 › icnv_a_1663208_sm2534.pdf]

**Supplementary Table S13. Consistency of the results for the validated miRNAs in the tissue and ascites experiments.**

| microRNA                                                                          | Ascites screening* | Ascites validation                   | Tissue screening                      | Tissue validation                                                |
|-----------------------------------------------------------------------------------|--------------------|--------------------------------------|---------------------------------------|------------------------------------------------------------------|
| <b>Generally consistent data</b>                                                  |                    |                                      |                                       |                                                                  |
| miR-135b-5p                                                                       | Overexpressed      | Overexpressed                        | Overexpressed                         | Overexpressed                                                    |
| miR-200b-3p                                                                       | Overexpressed      | Overexpressed*                       | Overexpressed                         | Overexpressed                                                    |
| miR-451a                                                                          | Underexpressed     | Underexpressed                       | Underexpressed, but not significantly | Underexpressed                                                   |
| <b>Data suggesting one type of miRNA dysregulation both in ascites and tumors</b> |                    |                                      |                                       |                                                                  |
| miR-182-5p                                                                        | Underexpressed     | Overexpressed                        | Overexpressed                         | Overexpressed                                                    |
| miR-203a-3p                                                                       | Overexpressed      | Overexpressed                        | Overexpressed                         | Overexpressed (but not significantly in independent validation)  |
| <b>Data with contrary results for ascites and tumors</b>                          |                    |                                      |                                       |                                                                  |
| miR-204-5p                                                                        | Overexpressed      | Overexpressed                        | Underexpressed                        | Underexpressed                                                   |
| <b>Inconclusive data</b>                                                          |                    |                                      |                                       |                                                                  |
|                                                                                   |                    |                                      |                                       |                                                                  |
| miR-185-5p                                                                        | Underexpressed     | Overexpressed, but not significantly | Overexpressed, but not significantly  | Underexpressed (but not significantly in independent validation) |
|                                                                                   |                    |                                      |                                       |                                                                  |
| miR-1290                                                                          | Overexpressed      | Overexpressed*                       | Not assessed                          | Overexpressed, but not significantly                             |

Notes: \* Závěský et al. (22). miRNA nomenclature follows miRBase ID. Consistency of results is considered in terms of congruent miRNA expression pattern across the ascitic fluid and tumor tissues as compared with control samples. Validation data are considered as a more robust proof of miRNA dysregulation in contrast to screening data and include analyses for independent samples.
