# Supplementary material
Source: publisher figshare collection journal article supplement (https://tandf.figshare.com/articles/dataset/_/9872795)
Supplement: Supplementary file 1 [file 1 › icnv_a_1663208_sm2537.pdf]

**Supplementary Table S12. ROC curve analysis (Ascites experiment, validation).**

**Part 1. Independent ovarian cancer samples (A9 and A12-17; n = 7) and independent control samples (RP10, 12, 13, 18, 22, 27, 28 and 33; n = 8)**

| MicroRNA    | AUC   | <i>P</i> (AUC) | SE     | 95% CI         | Sensitivity (%) | Specificity (%) |
|-------------|-------|----------------|--------|----------------|-----------------|-----------------|
| miR-203a-3p | 1.000 | <0.0001        | 0.000  | 0.782 to 1.000 | 100             | 100             |
| miR-204-5p  | 1.000 | <0.0001        | 0.000  | 0.782 to 1.000 | 100             | 100             |
| miR-135b-5p | 1.000 | <0.0001        | 0.000  | 0.782 to 1.000 | 100             | 100             |
| miR-451a    | 0.964 | <0.0001        | 0.0427 | 0.725 to 1.000 | 85.71           | 100             |
| miR-182-5p  | 0.964 | <0.0001        | 0.0427 | 0.725 to 1.000 | 85.71           | 100             |

Notes: Only significantly differentially expressed miRNAs were included in the ROC curve analysis. Normalization with endogenous controls was applied. AUC, area under the curve; SE, standard error; CI, confidence interval. miRNA nomenclature follows miRBase ID.

**Part 2. Ovarian cancer (all ascites samples, n = 12) and control samples (all plasma samples, n = 12)**

| MicroRNA    | AUC   | <i>P</i> (AUC) | SE     | 95% CI         | Sensitivity (%) | Specificity (%) |
|-------------|-------|----------------|--------|----------------|-----------------|-----------------|
| miR-203a-3p | 1.000 | <0.0001        | 0.000  | 0.858 to 1.000 | 100             | 100             |
| miR-204-5p  | 1.000 | <0.0001        | 0.000  | 0.858 to 1.000 | 100             | 100             |
| miR-135b-5p | 1.000 | <0.0001        | 0.000  | 0.858 to 1.000 | 100             | 100             |
| miR-451a    | 0.986 | <0.0001        | 0.0168 | 0.833 to 1.000 | 91.67           | 100             |
| miR-182-5p  | 0.986 | <0.0001        | 0.0168 | 0.833 to 1.000 | 91.67           | 100             |

Notes: Only significantly differentially expressed miRNAs were included in the ROC curve analysis. Normalization with endogenous controls was applied. AUC, area under curve; SE, standard error; CI, confidence interval. miRNA nomenclature follows miRBase ID.
