# Supplementary material
Source: publisher figshare collection journal article supplement (https://tandf.figshare.com/articles/dataset/_/9872795)
Supplement: Supplementary file 1 [file 1 › icnv_a_1663208_sm2538.pdf]

**Supplementary Table S11. Fold differences between ascitic fluid and control plasma (Ascites experiment, validation, independent samples).**

| <b>Overexpressed<br/>microRNA</b>  | <b>FD</b>   | <b>95% CI, low</b> | <b>95% CI,<br/>high</b> | <b>P</b>       |
|------------------------------------|-------------|--------------------|-------------------------|----------------|
| miR-203a-3p                        | 2376.11     | 933.64             | 6047.17                 | 0.00062        |
| miR-204-5p                         | 1114.12     | 456.71             | 2717.80                 | 0.00062        |
| miR-135b-5p                        | 614.44      | 277.47             | 1360.62                 | 0.00062        |
| miR-182-5p                         | 5.32        | 2.65               | 10.66                   | 0.00149        |
| <i>miR-185-5p</i>                  | <i>2.74</i> | <i>0.94</i>        | <i>7.97</i>             | <i>0.07211</i> |
|                                    |             |                    |                         |                |
| <b>Underexpressed<br/>microRNA</b> | <b>FD</b>   | <b>95% CI, low</b> | <b>95% CI,<br/>high</b> | <b>P</b>       |
| miR-451a                           | -33.33      | -100.00            | -7.143                  | 0.00149        |

Notes: Independent ascites samples (A9 and 12-17, n = 7) and independent control plasma samples (RP10, 12, 13, 18, 22, 27, 28 and 33; n = 8) were included in the analyses. Normalization with endogenous controls was applied. Nonsignificant differences are noted in italics. FD, fold difference; CI, confidence interval. miRNA nomenclature follows miRBase ID.
