# Supplementary material
Source: publisher figshare collection journal article supplement (https://tandf.figshare.com/articles/dataset/_/9872795)
Supplement: Supplementary file 1 [file 1 › icnv_a_1663208_sm2540.pdf]

**Supplementary Table S10. Fold differences between ascites and plasma (Ascites experiment, validation).**

| <b>Overexpressed microRNA</b>  | <b>FD</b>   | <b>95% CI, low</b> | <b>95% CI, high</b> | <b>P</b>       |
|--------------------------------|-------------|--------------------|---------------------|----------------|
| miR-203a-3p                    | 2790.88     | 1525.45            | 5106.03             | 0.00000        |
| miR-204-5p                     | 1642.84     | 881.55             | 3061.56             | 0.00000        |
| miR-135b-5p                    | 433.11      | 225.79             | 830.82              | 0.00000        |
| miR-182-5p                     | 6.00        | 3.53               | 10.20               | 0.00000        |
| <i>miR-185-5p</i>              | <i>2.24</i> | <i>1.04</i>        | <i>4.82</i>         | <i>0.07802</i> |
|                                |             |                    |                     |                |
| <b>Underexpressed microRNA</b> | <b>FD</b>   | <b>95% CI, low</b> | <b>95% CI, high</b> | <b>P</b>       |
| miR-451a                       | -71.93      | -216.20            | -23.93              | 0.00000        |

Notes: All samples included in Ascites experiment (validation) were analyzed. Normalization with endogenous controls was applied. Nonsignificant differences are noted in italics. FD, fold difference; CI, confidence interval. miRNA nomenclature follows miRBase ID.
