# Supplementary material
Source: publisher figshare collection journal article supplement (https://tandf.figshare.com/articles/dataset/_/9872795)
Supplement: Supplementary file 1 [file 1 › icnv_a_1663208_sm2543.pdf]

**Supplementary Table S9. ROC curve analysis (Tissue experiment, validation).**

**1. Independent ovarian cancer samples OC8-14 and independent control samples ON8-14**

| MicroRNA    | AUC   | <i>P</i> (AUC) | SE     | 95% CI         | Sensitivity (%) | Specificity (%) |
|-------------|-------|----------------|--------|----------------|-----------------|-----------------|
| miR-200b-3p | 1.000 | <0.0001        | 0.000  | 0.768 to 1.000 | 100             | 100             |
| miR-182-5p  | 1.000 | <0.0001        | 0.000  | 0.768 to 1.000 | 100             | 100             |
| miR-135b-5p | 0.980 | <0.0001        | 0.0289 | 0.735 to 1.000 | 100             | 85.71           |
| miR-451a    | 0.939 | <0.0001        | 0.0677 | 0.675 to 0.999 | 85.71           | 100             |
| miR-204-5p  | 0.878 | 0.0024         | 0.124  | 0.596 to 0.988 | 85.71           | 100             |

Notes: Only significantly differentially expressed miRNAs were included in the ROC curve analysis. Normalization with endogenous controls was applied. AUC, area under the curve; SE, standard error; CI, confidence interval. miRNA nomenclature follows the miRBase ID.

**2. Ovarian cancer samples OC1-14 and control samples ON1-14**

| MicroRNA    | AUC   | <i>P</i> (AUC) | SE      | 95% CI         | Sensitivity (%) | Specificity (%) |
|-------------|-------|----------------|---------|----------------|-----------------|-----------------|
| miR-200b-3p | 1.000 | 0.000          | 0.000   | 0.877 to 1.000 | 100             | 100             |
| miR-182-5p  | 0.995 | <0.0001        | 0.00722 | 0.867 to 1.000 | 100             | 92.86           |
| miR-451a    | 0.974 | <0.0001        | 0.0272  | 0.832 to 1.000 | 92.86           | 100             |
| miR-204-5p  | 0.934 | <0.0001        | 0.0665  | 0.772 to 0.993 | 92.86           | 100             |
| miR-135b-5p | 0.847 | <0.0001        | 0.0836  | 0.661 to 0.954 | 71.43           | 100             |
| miR-185-5p  | 0.811 | 0.0007         | 0.0918  | 0.619 to 0.933 | 71.43           | 92.86           |
| miR-203a-3p | 0.765 | 0.0049         | 0.0944  | 0.568 to 0.904 | 71.43           | 71.43           |

Notes: Only significantly differentially expressed miRNAs were included in the ROC curve analysis. Normalization with endogenous controls was applied. AUC, area under the curve; SE, standard error; CI, confidence interval. miRNA nomenclature follows miRBase ID.
