# Supplementary material
Source: publisher figshare collection journal article supplement (https://tandf.figshare.com/articles/dataset/_/9872795)
Supplement: Supplementary file 1 [file 1 › icnv_a_1663208_sm2544.pdf]

**Supplementary Table S8. Fold differences between tumor tissue and normal ovary (Tissue experiment, validation, independent samples).**

| <b>Overexpressed<br/>microRNA</b>  | <b>FD</b>    | <b>95% CI, low</b> | <b>95% CI, high</b> | <b>P</b>       |
|------------------------------------|--------------|--------------------|---------------------|----------------|
| miR-200b-3p                        | 51.71        | 18.08              | 147.87              | 0.00233        |
| miR-182-5p                         | 13.62        | 4.83               | 38.36               | 0.00233        |
| miR-135b-5p                        | 4.50         | 2.25               | 9.01                | 0.00311        |
| <i>miR-203a-3p</i>                 | <i>4.08</i>  | <i>1.21</i>        | <i>13.74</i>        | <i>0.09713</i> |
| <i>miR-1290</i>                    | <i>1.33</i>  | <i>0.17</i>        | <i>10.62</i>        | <i>0.53497</i> |
|                                    |              |                    |                     |                |
| <b>Underexpressed<br/>microRNA</b> | <b>FD</b>    | <b>95% CI, low</b> | <b>95% CI, high</b> | <b>P</b>       |
| miR-451a                           | -26.32       | -142.857           | -4.88               | 0.00816        |
| miR-204-5p                         | -32.26       | -333.333           | -3.48               | 0.02797        |
| <i>miR-185-5p</i>                  | <i>-1.62</i> | <i>-5.291</i>      | <i>-0.50</i>        | <i>0.23843</i> |

Notes: Independent ovarian cancer samples OC8-14 and independent control samples ON8-14 were compared. Normalization with endogenous controls was applied. Nonsignificant differences are noted in italics. FD, fold difference; CI, confidence interval. miRNA nomenclature follows miRBase ID.
