# Supplementary material
Source: publisher figshare collection journal article supplement (https://tandf.figshare.com/articles/dataset/_/9872795)
Supplement: Supplementary file 1 [file 1 › icnv_a_1663208_sm2545.pdf]

**Supplementary Table S7. Fold differences between high-grade and low-grade tumors (Tissue experiment, validation).**

| <b>Overexpressed<br/>microRNA</b>  | <b>FD</b>    | <b>95% CI, low</b> | <b>95% CI, high</b> | <b>P</b>       |
|------------------------------------|--------------|--------------------|---------------------|----------------|
| miR-182-5p                         | 2.94         | 1.65               | 5.22                | 0.00799        |
| <i>miR-451a</i>                    | <i>1.27</i>  | <i>0.20</i>        | <i>7.93</i>         | <i>0.94505</i> |
|                                    |              |                    |                     |                |
| <b>Underexpressed<br/>microRNA</b> | <b>FD</b>    | <b>95% CI, low</b> | <b>95% CI, high</b> | <b>P</b>       |
| miR-204-5p                         | -85.79       | -605.31            | -12.16              | 0.00799        |
| miR-135b-5p                        | -5.45        | -21.56             | -1.38               | 0.01066        |
| <i>miR-200b-3p</i>                 | <i>-2.55</i> | <i>-6.99</i>       | <i>-0.93</i>        | <i>0.21179</i> |
| <i>miR-185-5p</i>                  | <i>-2.56</i> | <i>-8.54</i>       | <i>-0.77</i>        | <i>0.48591</i> |
| <i>miR-203a-3p</i>                 | <i>-2.43</i> | <i>-12.86</i>      | <i>-0.46</i>        | <i>0.71928</i> |
| <i>miR-1290</i>                    | <i>-1.66</i> | <i>-22.90</i>      | <i>-0.12</i>        | <i>0.94505</i> |

Notes: High-grade samples OC2-9, OC12-13 (n = 10) were compared with low-grade samples OC1, 10, 11 and 14 (n = 4). Normalization with endogenous controls was applied. Nonsignificant differences are noted in italics. FD, fold difference; CI, confidence interval. miRNA nomenclature follows miRBase ID.
