# Supplementary material
Source: publisher figshare collection journal article supplement (https://tandf.figshare.com/articles/dataset/_/9872795)
Supplement: Supplementary file 1 [file 1 › icnv_a_1663208_sm2546.pdf]

**Supplementary Table S6. Fold differences between tumor tissue (early stages) and normal ovary (Tissue experiment, validation).**

| <b>Overexpressed<br/>microRNA</b>  | <b>FD</b>   | <b>95% CI, low</b> | <b>95% CI, high</b> | <b>P</b>       |
|------------------------------------|-------------|--------------------|---------------------|----------------|
| miR-182-5p                         | 13.37       | 5.67               | 31.51               | 0.00002        |
| miR-200b-3p                        | 72.12       | 33.76              | 154.04              | 0.00002        |
| miR-135b-5p                        | 2.91        | 1.20               | 7.04                | 0.00463        |
| miR-203a-3p                        | 3.37        | 1.22               | 9.31                | 0.04817        |
| <i>miR-1290</i>                    | <i>1.99</i> | <i>0.42</i>        | <i>9.56</i>         | <i>0.21185</i> |
|                                    |             |                    |                     |                |
| <b>Underexpressed<br/>microRNA</b> | <b>FD</b>   | <b>95% CI, low</b> | <b>95% CI, high</b> | <b>P</b>       |
| miR-451a                           | -52.46      | -160.15            | -17.18              | 0.00002        |
| miR-204-5p                         | -51.79      | -288.12            | -9.31               | 0.00434        |
| miR-185-5p                         | -1.74       | -3.73              | -0.81               | 0.03890        |

Notes: Early-stage samples OC2, 7-9, 10, 11, 13 and 14 (n = 8) were compared with control ovary samples ON1-14 (n = 14). Normalization with endogenous controls was applied. Nonsignificant differences are noted in italics. FD, fold difference; CI, confidence interval. miRNA nomenclature follows miRBase ID.
