# Supplementary material
Source: publisher figshare collection journal article supplement (https://tandf.figshare.com/articles/dataset/_/9872795)
Supplement: Supplementary file 1 [file 1 › icnv_a_1663208_sm2547.pdf]

**Supplementary Table S5. Fold differences between tumor tissue (advanced stages) and normal ovary (Tissue experiment, validation).**

| <b>Overexpressed microRNA</b>  | <b>FD</b>   | <b>95% CI, low</b> | <b>95% CI, high</b> | <b>P</b>       |
|--------------------------------|-------------|--------------------|---------------------|----------------|
| miR-200b-3p                    | 52.00       | 24.83              | 108.89              | 0.00021        |
| miR-182-5p                     | 13.77       | 5.15               | 36.79               | 0.00028        |
| miR-135b-5p                    | 2.22        | 1.30               | 3.79                | 0.04341        |
| <i>miR-203a-3p</i>             | <i>1.83</i> | <i>1.01</i>        | <i>3.32</i>         | <i>0.08657</i> |
| <i>miR-1290</i>                | <i>1.13</i> | <i>0.26</i>        | <i>4.84</i>         | <i>0.77905</i> |
|                                |             |                    |                     |                |
| <b>Underexpressed microRNA</b> | <b>FD</b>   | <b>95% CI, low</b> | <b>95% CI, high</b> | <b>P</b>       |
| miR-204-5p                     | -291.086522 | -831.97            | -101.84             | 0.00021        |
| miR-451a                       | -33.483988  | -149.39            | -7.51               | 0.00196        |
| miR-185-5p                     | -2.557596   | -5.08              | -1.29               | 0.02460        |

Notes: Advanced-stage samples OC1, OC3-6 and OC12 (n = 6) were compared with control ovary samples ON1-14 (n = 14). Normalization with endogenous controls was applied. Nonsignificant differences are noted in italics. FD, fold difference; CI, confidence interval. miRNA nomenclature follows miRBase ID.
