# Supplementary material
Source: publisher figshare collection journal article supplement (https://tandf.figshare.com/articles/dataset/_/9872795)
Supplement: Supplementary file 1 [file 1 › icnv_a_1663208_sm2548.pdf]

**Supplementary Table S4. Fold differences between tumor tissue and normal ovary (Tissue experiment, validation).**

| <b>Overexpressed<br/>microRNA</b>  | <b>FD</b>   | <b>95% CI, low</b> | <b>95% CI, high</b> | <b>P</b>       |
|------------------------------------|-------------|--------------------|---------------------|----------------|
| miR-200b-3p                        | 62.68       | 33.74              | 116.47              | 0.00000        |
| miR-182-5p                         | 13.54       | 6.88               | 26.64               | 0.00000        |
| miR-203a-3p                        | 2.59        | 1.18               | 5.72                | 0.01852        |
| miR-135b-5p                        | 2.59        | 1.25               | 5.35                | 0.00189        |
| <i>miR-1290</i>                    | <i>1.56</i> | <i>0.43</i>        | <i>5.73</i>         | <i>0.30643</i> |
|                                    |             |                    |                     |                |
| <b>Underexpressed<br/>microRNA</b> | <b>FD</b>   | <b>95% CI, low</b> | <b>95% CI, high</b> | <b>P</b>       |
| miR-451a                           | -43.28      | -122.06            | -15.34              | 0.00000        |
| miR-204-5p                         | -108.54     | -464.74            | -25.35              | 0.00004        |
| miR-185-5p                         | -2.05       | -3.89              | -1.08               | 0.00555        |

Notes: Ovarian cancer tissue samples OC1-14 (n = 14) were compared with normal ovary samples ON1-14 (n = 14). Normalization with endogenous controls was applied. Nonsignificant differences are noted in italics. FD, fold difference; CI, confidence interval. miRNA nomenclature follows miRBase ID.
