# Supplementary material
Source: publisher figshare collection journal article supplement (https://tandf.figshare.com/articles/dataset/_/9872795)
Supplement: Supplementary file 1 [file 1 › icnv_a_1663208_sm2549.pdf]

**Supplementary Table S3. Fold differences between tumor tissue and normal ovary in TaqMan Array Human MicroRNA A cards (overview).**

| microRNA                                                     | FD (Ct<br><35) | P       | microRNA                                                     | FD (Ct<br>≤40) | P       |
|--------------------------------------------------------------|----------------|---------|--------------------------------------------------------------|----------------|---------|
| <b>Consistently overexpressed miRNAs across both cutoffs</b> |                |         | <b>Consistently overexpressed miRNAs across both cutoffs</b> |                |         |
|                                                              |                |         |                                                              |                |         |
| hsa-miR-141-3p-4373137                                       | 684.65         | 0.02277 | hsa-miR-141-3p-4373137                                       | 1042.50        | 0.00644 |
| hsa-miR-200a-3p-4378069                                      | 353.39         | 0.02277 | hsa-miR-200a-3p-4378069                                      | 894.43         | 0.00644 |
| hsa-miR-429-4373203                                          | 287.91         | 0.02277 | hsa-miR-200c-3p-4395411                                      | 630.65         | 0.00644 |
| hsa-miR-200c-3p-4395411                                      | 240.62         | 0.02277 | hsa-miR-429-4373203                                          | 357.37         | 0.00644 |
| hsa-miR-200b-3p-4395362                                      | 153.73         | 0.02277 | hsa-miR-200b-3p-4395362                                      | 234.33         | 0.00644 |
| hsa-miR-182-5p-4395445                                       | 30.99          | 0.03207 | hsa-miR-182-5p-4395445                                       | 77.74          | 0.00644 |
| hsa-miR-224-4395210                                          | 9.43           | 0.03207 | hsa-miR-224-4395210                                          | 12.41          | 0.01850 |
| hsa-miR-425-5p-4380926                                       | 5.63           | 0.02277 | hsa-miR-425-5p-4380926                                       | 8.58           | 0.01850 |
|                                                              |                |         |                                                              |                |         |
| <b>Specifically overexpressed miRNAs for this cutoff</b>     |                |         | <b>Specifically overexpressed miRNAs for this cutoff</b>     |                |         |
| hsa-miR-135b-5p-4395372                                      | 39.33          | 0.03207 | hsa-miR-885-5p-4395407                                       | 529.42         | 0.00644 |
| hsa-miR-15b-5p-4373122                                       | 2.73           | 0.04582 | hsa-miR-205-5p-4373093                                       | 61.02          | 0.02252 |
|                                                              |                |         | hsa-miR-183-5p-4395380                                       | 45.93          | 0.01139 |
|                                                              |                |         | hsa-miR-522-3p-4395524                                       | 24.12          | 0.02252 |
|                                                              |                |         |                                                              |                |         |
|                                                              |                |         | hsa-miR-517c-3p-4373264                                      | 20.84          | 0.02252 |
|                                                              |                |         | hsa-miR-521-4373259                                          | 15.56          | 0.04261 |
|                                                              |                |         | hsa-miR-107-4373154                                          | 12.67          | 0.04261 |
|                                                              |                |         | hsa-miR-876-3p-4395336                                       | 12.54          | 0.03416 |
|                                                              |                |         | hsa-miR-210-3p-4373089                                       | 11.06          | 0.00644 |
|                                                              |                |         | hsa-miR-888-5p-4395323                                       | 7.69           | 0.04261 |
|                                                              |                |         | hsa-miR-203a-3p-4373095                                      | 7.06           | 0.03416 |
|                                                              |                |         | hsa-miR-452-5p-4395440                                       | 5.69           | 0.00644 |
|                                                              |                |         | hsa-miR-484-4381032                                          | 5.52           | 0.04261 |

  

| microRNA                                                      | FD (Ct<br><35) | P       |
|---------------------------------------------------------------|----------------|---------|
| <b>Consistently underexpressed miRNAs across both cutoffs</b> |                |         |
|                                                               |                |         |
| hsa-miR-204-5p-4373094                                        | -43.29         | 0.03207 |
| hsa-miR-145-5p-4395389                                        | -13.40         | 0.02277 |
| hsa-miR-195-5p-4373105                                        | -12.94         | 0.02277 |
| hsa-miR-199a-3p-4395415                                       | -11.52         | 0.02277 |
| hsa-miR-143-3p-4395360                                        | -9.57          | 0.03207 |
| hsa-miR-140-3p-4395345                                        | -9.43          | 0.02277 |

|                                                           |       |         |
|-----------------------------------------------------------|-------|---------|
| hsa-miR-574-3p-4395460                                    | -7.93 | 0.02277 |
| hsa-miR-376c-3p-4395233                                   | -7.43 | 0.02277 |
| hsa-let-7e-4395517                                        | -7.11 | 0.04934 |
| hsa-miR-486-5p-4378096                                    | -7.00 | 0.03207 |
| hsa-miR-532-3p-4395466                                    | -6.74 | 0.03207 |
|                                                           |       |         |
| <b>Specifically underexpressed miRNAs for this cutoff</b> |       |         |
|                                                           |       |         |
|                                                           |       |         |
| hsa-miR-127-3p-4373147                                    | -7.11 | 0.04582 |
| hsa-miR-320a-3p-4395388                                   | -4.07 | 0.04582 |
| hsa-miR-411-5p-4381013                                    | -3.54 | 0.02277 |
| hsa-miR-345-5p-4395297                                    | -3.02 | 0.04737 |
| hsa-miR-186-5p-4395396                                    | -1.96 | 0.04582 |

|                         |      |         |
|-------------------------|------|---------|
| hsa-miR-10a-5p-4373153  | 5.45 | 0.00644 |
| hsa-miR-106b-5p-4373155 | 5.10 | 0.01850 |
| hsa-miR-17-5p-4395419   | 4.33 | 0.00644 |
| hsa-miR-130b-3p-4373144 | 3.95 | 0.04261 |
| hsa-miR-744-5p-4395435  | 2.94 | 0.04261 |
| hsa-miR-454-3p-4395434  | 2.57 | 0.02252 |
| hsa-miR-103a-3p-4373158 | 2.36 | 0.03416 |

| microRNA                                                      | FD (Ct $\leq 40$ ) | P       |
|---------------------------------------------------------------|--------------------|---------|
| <b>Consistently underexpressed miRNAs across both cutoffs</b> |                    |         |
|                                                               |                    |         |
| hsa-miR-204-5p-4373094                                        | -76.22             | 0.00644 |
| hsa-miR-199a-3p-4395415                                       | -11.50             | 0.00644 |
| hsa-miR-140-3p-4395345                                        | -10.12             | 0.00644 |
| hsa-let-7e-4395517                                            | -10.09             | 0.00644 |
| hsa-miR-532-3p-4395466                                        | -10.05             | 0.00644 |
| hsa-miR-143-3p-4395360                                        | -9.56              | 0.00644 |
| hsa-miR-145-5p-4395389                                        | -8.79              | 0.00644 |
| hsa-miR-195-5p-4373105                                        | -8.49              | 0.00644 |
| hsa-miR-486-5p-4378096                                        | -7.15              | 0.02252 |
| hsa-miR-574-3p-4395460                                        | -5.20              | 0.00644 |
| hsa-miR-376c-3p-4395233                                       | -4.87              | 0.01850 |
|                                                               |                    |         |
| <b>Specifically underexpressed miRNAs for this cutoff</b>     |                    |         |
|                                                               |                    |         |
|                                                               |                    |         |
| hsa-miR-424-5p-4373201                                        | -46.49             | 0.00644 |
| hsa-miR-196b-5p-4395326                                       | -34.56             | 0.04261 |
| hsa-miR-539-5p-4378103                                        | -32.31             | 0.03416 |

|                         |        |         |
|-------------------------|--------|---------|
| hsa-miR-125b-5p-4373148 | -30.00 | 0.01139 |
| hsa-miR-483-5p-4395449  | -26.46 | 0.01139 |
| hsa-let-7b-4395446      | -24.85 | 0.03416 |
| hsa-miR-433-3p-4373205  | -24.26 | 0.03416 |
| hsa-miR-214-3p-4395417  | -17.53 | 0.02252 |
| hsa-let-7c-4373167      | -16.61 | 0.04261 |
| hsa-miR-486-3p-4395204  | -16.29 | 0.04261 |
| hsa-miR-140-5p-4373374  | -13.06 | 0.04261 |
| hsa-miR-337-5p-4395267  | -12.72 | 0.01850 |
| hsa-miR-370-3p-4395386  | -11.15 | 0.04261 |
| hsa-miR-134-5p-4373299  | -9.95  | 0.02252 |
| hsa-miR-455-5p-4378098  | -6.83  | 0.02252 |
| hsa-miR-487b-3p-4378102 | -6.72  | 0.02252 |
| hsa-miR-100-5p-4373160  | -6.31  | 0.02252 |
| hsa-let-7a-4373169      | -6.29  | 0.04261 |
| hsa-miR-26a-5p-4395166  | -5.75  | 0.00644 |
| hsa-miR-193a-5p-4395392 | -5.66  | 0.02252 |
| hsa-miR-101-3p-4395364  | -5.25  | 0.02252 |
| hsa-miR-532-5p-4380928  | -5.04  | 0.00644 |
| hsa-miR-362-5p-4378092  | -4.99  | 0.01850 |
| hsa-miR-99a-5p-4373008  | -4.49  | 0.02252 |
| hsa-miR-493-3p-4395475  | -3.98  | 0.02252 |
| hsa-miR-26b-5p-4395167  | -3.76  | 0.04261 |
| hsa-miR-495-3p-4381078  | -3.75  | 0.04261 |

Notes: Cancer samples OC1-7 were compared with control samples ON1-7. Normalization using global means was applied. Confidence intervals are noted in Tables S1 and S2. Only significant differences are noted. miRNA nomenclature follows miRBase ID and code-number identification in the TaqMan Array.
