# Supplementary material
Source: publisher figshare collection journal article supplement (https://tandf.figshare.com/articles/dataset/_/9872795)
Supplement: Supplementary file 1 [file 1 › icnv_a_1663208_sm2554.pdf]

**Supplementary Table S2. Fold differences between tumor tissue and normal ovary in TaqMan Array Human MicroRNA A cards specific for a cutoff of Ct ≤40.**

| <b>Overexpressed microRNA</b>  | <b>FD (Ct ≤40)</b> | <b>95% CI, low</b> | <b>95% CI, high</b> | <b>P</b> |
|--------------------------------|--------------------|--------------------|---------------------|----------|
| hsa-miR-885-5p-4395407         | 529.42             | 73.48              | 3814.61             | 0.00644  |
| hsa-miR-205-5p-4373093         | 61.02              | 4.70               | 791.57              | 0.02252  |
| hsa-miR-183-5p-4395380         | 45.93              | 9.34               | 225.81              | 0.01139  |
| hsa-miR-522-3p-4395524         | 24.12              | 4.09               | 142.15              | 0.02252  |
| hsa-miR-517c-3p-4373264        | 20.84              | 2.54               | 170.99              | 0.02252  |
| hsa-miR-521-4373259            | 15.56              | 0.96               | 252.98              | 0.04261  |
| hsa-miR-107-4373154            | 12.67              | 1.76               | 91.04               | 0.04261  |
| hsa-miR-876-3p-4395336         | 12.54              | 1.70               | 92.33               | 0.03416  |
| hsa-miR-210-3p-4373089         | 11.06              | 2.78               | 44.05               | 0.00644  |
| hsa-miR-888-5p-4395323         | 7.69               | 1.02               | 58.32               | 0.04261  |
| hsa-miR-203a-3p-4373095        | 7.06               | 2.20               | 22.68               | 0.03416  |
| hsa-miR-452-5p-4395440         | 5.69               | 2.90               | 11.15               | 0.00644  |
| hsa-miR-484-4381032            | 5.52               | 1.66               | 18.34               | 0.04261  |
| hsa-miR-10a-5p-4373153         | 5.45               | 2.74               | 10.87               | 0.00644  |
| hsa-miR-106b-5p-4373155        | 5.10               | 2.33               | 11.18               | 0.01850  |
| hsa-miR-17-5p-4395419          | 4.33               | 2.77               | 6.76                | 0.00644  |
| hsa-miR-130b-3p-4373144        | 3.95               | 1.47               | 10.59               | 0.04261  |
| hsa-miR-744-5p-4395435         | 2.94               | 1.48               | 5.85                | 0.04261  |
| hsa-miR-454-3p-4395434         | 2.57               | 1.61               | 4.09                | 0.02252  |
| hsa-miR-103-3p-4373158         | 2.36               | 1.38               | 4.05                | 0.03416  |
|                                |                    |                    |                     |          |
| <b>Underexpressed microRNA</b> | <b>FD (Ct ≤40)</b> | <b>95% CI, low</b> | <b>95%, CI high</b> | <b>P</b> |
| hsa-miR-424-5p-4373201         | -46.49             | -243.84            | -8.86               | 0.00644  |
| hsa-miR-196b-5p-4395326        | -34.56             | -368.52            | -3.24               | 0.04261  |
| hsa-miR-539-5p-4378103         | -32.31             | -340.77            | -3.06               | 0.03416  |
| hsa-miR-125b-5p-4373148        | -30.00             | -182.45            | -4.93               | 0.01139  |
| hsa-miR-483-5p-4395449         | -26.46             | -140.18            | -5.00               | 0.01139  |
| hsa-let-7b-4395446             | -24.85             | -195.54            | -3.16               | 0.03416  |
| hsa-miR-433-3p-4373205         | -24.26             | -211.18            | -2.79               | 0.03416  |
| hsa-miR-214-3p-4395417         | -17.53             | -104.66            | -2.94               | 0.02252  |
| hsa-let-7c-4373167             | -16.61             | -112.63            | -2.45               | 0.04261  |
| hsa-miR-486-3p-4395204         | -16.29             | -101.27            | -2.62               | 0.04261  |
| hsa-miR-140-5p-4373374         | -13.06             | -81.98             | -2.08               | 0.04261  |
| hsa-miR-337-5p-4395267         | -12.72             | -63.58             | -2.55               | 0.01850  |
| hsa-miR-370-3p-4395386         | -11.15             | -69.36             | -1.79               | 0.04261  |
| hsa-miR-134-5p-4373299         | -9.95              | -33.79             | -2.93               | 0.02252  |
| hsa-miR-455-5p-4378098         | -6.83              | -18.04             | -2.59               | 0.02252  |
| hsa-miR-487b-3p-4378102        | -6.72              | -20.70             | -2.18               | 0.02252  |

|                         |       |        |       |         |
|-------------------------|-------|--------|-------|---------|
| hsa-miR-100-5p-4373160  | -6.31 | -23.77 | -1.68 | 0.02252 |
| hsa-let-7a-4373169      | -6.29 | -35.83 | -1.10 | 0.04261 |
| hsa-miR-26a-5p-4395166  | -5.75 | -15.87 | -2.09 | 0.00644 |
| hsa-miR-193a-5p-4395392 | -5.66 | -12.09 | -2.65 | 0.02252 |
| hsa-miR-101-3p-4395364  | -5.25 | -21.49 | -1.28 | 0.02252 |
| hsa-miR-532-5p-4380928  | -5.04 | -18.11 | -1.40 | 0.00644 |
| hsa-miR-362-5p-4378092  | -4.99 | -23.14 | -1.07 | 0.01850 |
| hsa-miR-99a-5p-4373008  | -4.49 | -15.47 | -1.30 | 0.02252 |
| hsa-miR-493-3p-4395475  | -3.98 | -9.88  | -1.60 | 0.02252 |
| hsa-miR-26b-5p-4395167  | -3.76 | -14.83 | -0.95 | 0.04261 |
| hsa-miR-495-3p-4381078  | -3.75 | -8.39  | -1.68 | 0.04261 |

Notes: Cancer samples OC1-7 were compared with control samples ON1-7. Global mean normalization was applied. Only significant differences are noted. FD, fold difference; CI, confidence interval. miRNA nomenclature follows miRBase ID and code-number identification in the TaqMan Array.
