# Supplementary material
Source: publisher figshare collection journal article supplement (https://tandf.figshare.com/articles/dataset/_/9872795)
Supplement: Supplementary file 1 [file 1 › icnv_a_1663208_sm2559.pdf]

**Supplementary Table S1. Fold differences between tumor tissue and normal ovary in TaqMan Array Human MicroRNA A cards, specific for a cutoff of Ct <35.**

| <b>Overexpressed miRNA</b>  | <b>FD (Ct &lt;35)</b> | <b>95% CI, low</b> | <b>95% CI, high</b> | <b>P</b> |
|-----------------------------|-----------------------|--------------------|---------------------|----------|
| hsa-miR-135b-5p-4395372     | 39.33                 | 13.03              | 118.73              | 0.03207  |
| hsa-miR-15b-5p-4373122      | 2.73                  | 1.61               | 4.64                | 0.04582  |
|                             |                       |                    |                     |          |
| <b>Underexpressed miRNA</b> | <b>FD (Ct &lt;35)</b> | <b>95% CI, low</b> | <b>95% CI, high</b> | <b>P</b> |
| hsa-miR-127-3p-4373147      | -7.11                 | -17.65             | -2.86               | 0.04582  |
| hsa-miR-320-3p-4395388      | -4.07                 | -9.69              | -1.71               | 0.04582  |
| hsa-miR-411-5p-4381013      | -3.54                 | -5.76              | -2.18               | 0.02277  |
| hsa-miR-345-5p-4395297      | -3.02                 | -8.34              | -1.09               | 0.04737  |
| hsa-miR-186-5p-4395396      | -1.96                 | -3.18              | -1.20               | 0.04582  |

Notes: Cancer samples OC1-7 were compared with control samples ON1-7. Global mean normalization was applied. FD, fold difference; CI, confidence interval. Only significant differences are noted. miRNA nomenclature follows miRBase ID and code-number identification in the TaqMan Array.
